# Supplementary material for: Prognostic and clinicopathological significance of long noncoding RNA CTD-2510F5.4 in gastric cancer
Source: Springer Nature journal article supplement (doi:10.1007/s10120-018-00911-x), 2018-12-17
Supplement: MOESM1 [file 16813506]

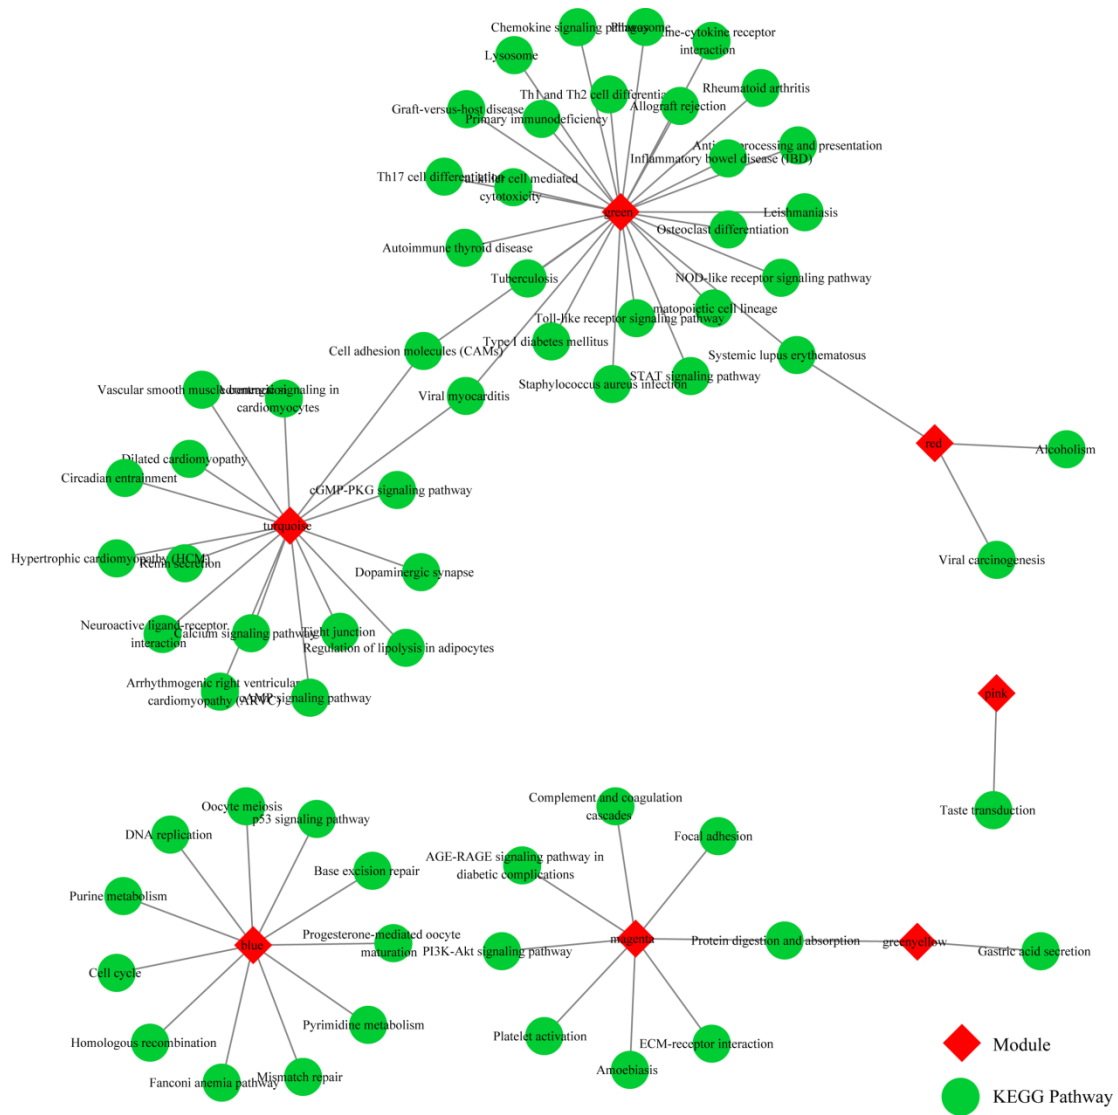

**Fig. S1:** KEGG pathway analysis showing 7 modules were enriched in 64 pathways, and distinct enriched pathways were displayed between different modules.

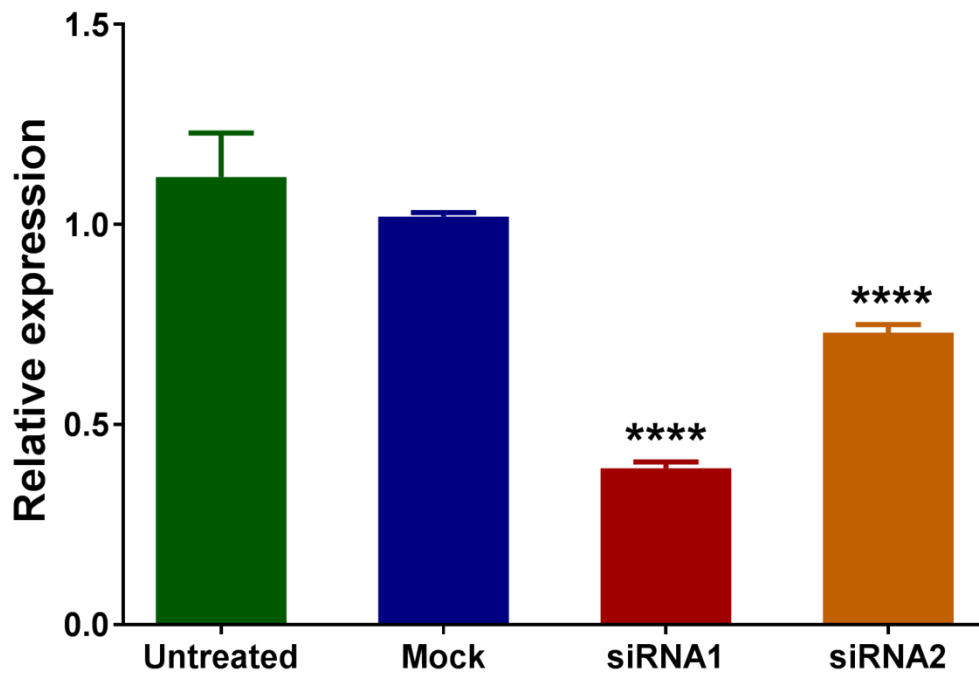

**Fig. S2:** Knock down of CTD-2510F5.4 by siRNA transfection in HGC-27 cell line. qRT-PCR analysis showing effective reduction in CTD-2510F5.4 gene expression after 48 hours of siRNA1 transfection (more than 60%,  $p < 0.0001$ ), and only approximately 30% of reduced gene expression by siRNA2 transfection ( $p < 0.0001$ ). Thus, siRNA1 was used in the following functional assays. The mRNA expression level of CTD-2510F5.4 was normalized against the endogenous control of GAPDH.

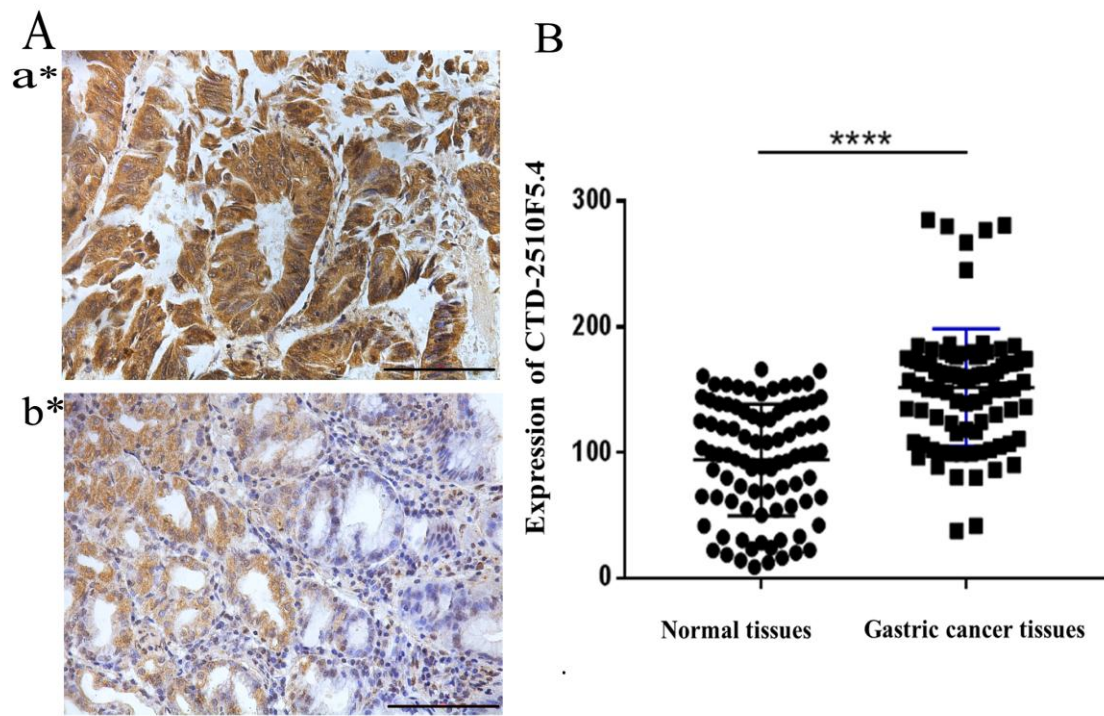

**Fig. S3.** CTD-2510F5.4 expression in 90 paired gastric cancer tissues and adjacent-normal gastric tissues. (a) Representative images of CTD-2510F5.4 expression detected by ISH in a gastric cancer tissue (a\*) and a normal gastric tissue (b\*) (20 $\times$ ). Scale bar=20 $\mu$ m. (b) Comparison of CTD-2510F5.4 expression level in gastric cancer tissues and adjacent-normal gastric tissues by wilcoxon signed-rank test ( $p < 0.01$ ), data shown were mean  $\pm$  SD.

**Table S1: KEGG analysis for DEGs.**

| <b>ID</b> | <b>Description</b>                      | <b>GeneRatio</b> | <b>BgRatio</b> | <b>pvalue</b> | <b>p.adjust</b> | <b>qvalue</b> | <b>Count</b> |
|-----------|-----------------------------------------|------------------|----------------|---------------|-----------------|---------------|--------------|
| hsa04110  | Cell cycle                              | 43/909           | 122/7249       | 6.43E-11      | 1.19E-08        | 1.13E-08      | 43           |
| hsa03030  | DNA replication                         | 21/909           | 36/7249        | 8.12E-11      | 1.19E-08        | 1.13E-08      | 21           |
| hsa03460  | Fanconi anemia pathway                  | 19/909           | 55/7249        | 2.03E-05      | 0.001986        | 0.001884      | 19           |
| hsa03440  | Homologous recombination                | 15/909           | 41/7249        | 7.08E-05      | 0.004586        | 0.004349      | 15           |
| hsa04514  | Cell adhesion molecules (CAMs)          | 35/909           | 145/7249       | 7.83E-05      | 0.004586        | 0.004349      | 35           |
| hsa04020  | Calcium signaling pathway               | 41/909           | 182/7249       | 0.000106      | 0.00518         | 0.004913      | 41           |
| hsa04080  | Neuroactive ligand-receptor interaction | 55/909           | 278/7249       | 0.000313      | 0.013111        | 0.012435      | 55           |
| hsa04974  | Protein digestion and absorption        | 23/909           | 90/7249        | 0.000544      | 0.019913        | 0.018887      | 23           |
| hsa05322  | Systemic lupus erythematosus            | 30/909           | 133/7249       | 0.000847      | 0.027558        | 0.026138      | 30           |
| hsa04115  | p53 signaling pathway                   | 18/909           | 67/7249        | 0.001139      | 0.03338         | 0.031659      | 18           |
| hsa05323  | Rheumatoid arthritis                    | 22/909           | 90/7249        | 0.001348      | 0.035898        | 0.034047      | 22           |
| hsa00240  | Pyrimidine metabolism                   | 24/909           | 102/7249       | 0.001471      | 0.03591         | 0.034059      | 24           |

**Table S2: Biological process of GO analysis on DEGs.**

| <b>ID</b>  | <b>Description</b>                                        | <b>Gene Ratio</b> | <b>Bg Ratio</b> | <b>p value</b> | <b>p.adjust</b> | <b>q value</b> | <b>Count</b> |
|------------|-----------------------------------------------------------|-------------------|-----------------|----------------|-----------------|----------------|--------------|
| GO:0007059 | chromosome segregation                                    | 112/2102          | 330/16992       | 7.10E-25       | 3.51E-21        | 2.86E-21       | 112          |
| GO:0007067 | mitotic nuclear division                                  | 137/2102          | 453/16992       | 1.25E-24       | 3.51E-21        | 2.86E-21       | 137          |
| GO:0098813 | nuclear chromosome segregation                            | 99/2102           | 287/16992       | 1.03E-22       | 1.93E-19        | 1.57E-19       | 99           |
| GO:0000819 | sister chromatid segregation                              | 83/2102           | 218/16992       | 2.06E-22       | 2.90E-19        | 2.36E-19       | 83           |
| GO:0006260 | DNA replication                                           | 94/2102           | 291/16992       | 2.19E-19       | 2.47E-16        | 2.01E-16       | 94           |
| GO:0006261 | DNA-dependent DNA replication                             | 59/2102           | 138/16992       | 3.54E-19       | 3.32E-16        | 2.70E-16       | 59           |
| GO:0006270 | DNA replication initiation                                | 26/2102           | 39/16992        | 3.51E-15       | 2.83E-12        | 2.30E-12       | 26           |
| GO:0000070 | mitotic sister chromatid segregation                      | 51/2102           | 134/16992       | 2.72E-14       | 1.92E-11        | 1.56E-11       | 51           |
| GO:0007062 | sister chromatid cohesion                                 | 49/2102           | 126/16992       | 3.27E-14       | 2.05E-11        | 1.67E-11       | 49           |
| GO:0000082 | G1/S transition of mitotic cell cycle                     | 69/2102           | 241/16992       | 8.69E-12       | 4.61E-09        | 3.75E-09       | 69           |
| GO:0071103 | DNA conformation change                                   | 77/2102           | 283/16992       | 9.00E-12       | 4.61E-09        | 3.75E-09       | 77           |
| GO:0003012 | muscle system process                                     | 98/2102           | 402/16992       | 1.63E-11       | 7.65E-09        | 6.22E-09       | 98           |
| GO:0044843 | cell cycle G1/S phase transition                          | 70/2102           | 254/16992       | 4.21E-11       | 1.83E-08        | 1.49E-08       | 70           |
| GO:0006936 | muscle contraction                                        | 84/2102           | 331/16992       | 5.34E-11       | 2.15E-08        | 1.75E-08       | 84           |
| GO:0051321 | meiotic cell cycle                                        | 65/2102           | 233/16992       | 1.18E-10       | 4.45E-08        | 3.62E-08       | 65           |
| GO:0006310 | DNA recombination                                         | 71/2102           | 267/16992       | 1.79E-10       | 6.31E-08        | 5.13E-08       | 71           |
| GO:0007052 | mitotic spindle organization                              | 35/2102           | 91/16992        | 2.13E-10       | 6.66E-08        | 5.42E-08       | 35           |
| GO:1902850 | microtubule cytoskeleton organization involved in mitosis | 35/2102           | 91/16992        | 2.13E-10       | 6.66E-08        | 5.42E-08       | 35           |
| GO:0007051 | spindle organization                                      | 47/2102           | 146/16992       | 2.52E-10       | 7.47E-08        | 6.08E-08       | 47           |
| GO:0000226 | microtubule cytoskeleton organization                     | 100/2102          | 443/16992       | 1.01E-09       | 2.85E-07        | 2.32E-07       | 100          |
| GO:0051983 | regulation of chromosome segregation                      | 32/2102           | 83/16992        | 1.17E-09       | 3.14E-07        | 2.55E-07       | 32           |
| GO:0030198 | extracellular matrix organization                         | 77/2102           | 315/16992       | 2.15E-09       | 5.51E-07        | 4.48E-07       | 77           |
| GO:0043062 | extracellular structure organization                      | 77/2102           | 316/16992       | 2.50E-09       | 6.14E-07        | 4.99E-07       | 77           |
| GO:0006323 | DNA packaging                                             | 55/2102           | 199/16992       | 4.51E-09       | 1.06E-06        | 8.61E-07       | 55           |
| GO:0000075 | cell cycle checkpoint                                     | 59/2102           | 221/16992       | 5.22E-09       | 1.18E-06        | 9.56E-07       | 59           |
| GO:1903046 | meiotic cell cycle process                                | 54/2102           | 195/16992       | 5.77E-09       | 1.25E-06        | 1.02E-06       | 54           |
| GO:0032963 | collagen metabolic process                                | 37/2102           | 111/16992       | 6.87E-09       | 1.43E-06        | 1.17E-06       | 37           |
| GO:0044236 | multicellular organism metabolic process                  | 42/2102           | 136/16992       | 8.96E-09       | 1.80E-06        | 1.47E-06       | 42           |
| GO:0007126 | meiotic nuclear division                                  | 51/2102           | 184/16992       | 1.47E-08       | 2.85E-06        | 2.32E-06       | 51           |
| GO:0008016 | regulation of heart                                       | 59/2102           | 229/16992       | 2.15E-08       | 3.88E-06        | 3.16E-06       | 59           |

|            |                                                          |          |           |          |          |          |     |
|------------|----------------------------------------------------------|----------|-----------|----------|----------|----------|-----|
|            | contraction                                              |          |           |          |          |          |     |
| GO:0071897 | DNA biosynthetic process                                 | 54/2102  | 202/16992 | 2.19E-08 | 3.88E-06 | 3.16E-06 | 54  |
| GO:0044057 | regulation of system process                             | 104/2102 | 493/16992 | 2.21E-08 | 3.88E-06 | 3.16E-06 | 104 |
| GO:0044259 | multicellular organismal macromolecule metabolic process | 37/2102  | 116/16992 | 2.61E-08 | 4.44E-06 | 3.61E-06 | 37  |
| GO:0001655 | urogenital system development                            | 74/2102  | 315/16992 | 2.68E-08 | 4.44E-06 | 3.61E-06 | 74  |
| GO:0007088 | regulation of mitotic nuclear division                   | 44/2102  | 151/16992 | 2.82E-08 | 4.54E-06 | 3.69E-06 | 44  |
| GO:0008015 | blood circulation                                        | 104/2102 | 496/16992 | 3.06E-08 | 4.79E-06 | 3.90E-06 | 104 |
| GO:0033260 | nuclear DNA replication                                  | 16/2102  | 29/16992  | 3.94E-08 | 6.01E-06 | 4.89E-06 | 16  |
| GO:0003013 | circulatory system process                               | 104/2102 | 500/16992 | 4.71E-08 | 6.98E-06 | 5.68E-06 | 104 |
| GO:0042391 | regulation of membrane potential                         | 84/2102  | 379/16992 | 5.28E-08 | 7.63E-06 | 6.20E-06 | 84  |
| GO:0072001 | renal system development                                 | 67/2102  | 280/16992 | 5.71E-08 | 8.05E-06 | 6.55E-06 | 67  |
| GO:0006312 | mitotic recombination                                    | 21/2102  | 49/16992  | 9.67E-08 | 1.33E-05 | 1.08E-05 | 21  |
| GO:0051783 | regulation of nuclear division                           | 47/2102  | 173/16992 | 1.04E-07 | 1.39E-05 | 1.13E-05 | 47  |
| GO:2000021 | regulation of ion homeostasis                            | 51/2102  | 195/16992 | 1.14E-07 | 1.50E-05 | 1.22E-05 | 51  |
| GO:0044786 | cell cycle DNA replication                               | 18/2102  | 38/16992  | 1.23E-07 | 1.58E-05 | 1.28E-05 | 18  |
| GO:0001501 | skeletal system development                              | 100/2102 | 485/16992 | 1.33E-07 | 1.67E-05 | 1.36E-05 | 100 |
| GO:0032844 | regulation of homeostatic process                        | 94/2102  | 449/16992 | 1.52E-07 | 1.86E-05 | 1.52E-05 | 94  |
| GO:0001822 | kidney development                                       | 63/2102  | 265/16992 | 1.81E-07 | 2.17E-05 | 1.77E-05 | 63  |
| GO:0030574 | collagen catabolic process                               | 25/2102  | 68/16992  | 2.23E-07 | 2.56E-05 | 2.09E-05 | 25  |
| GO:0051304 | chromosome separation                                    | 25/2102  | 68/16992  | 2.23E-07 | 2.56E-05 | 2.09E-05 | 25  |
| GO:0006271 | DNA strand elongation involved in DNA replication        | 11/2102  | 16/16992  | 2.44E-07 | 2.69E-05 | 2.19E-05 | 11  |
| GO:0034501 | protein localization to kinetochore                      | 11/2102  | 16/16992  | 2.44E-07 | 2.69E-05 | 2.19E-05 | 11  |
| GO:1903522 | regulation of blood circulation                          | 64/2102  | 273/16992 | 2.49E-07 | 2.70E-05 | 2.19E-05 | 64  |
| GO:0071459 | protein localization to chromosome, centromeric region   | 12/2102  | 19/16992  | 2.71E-07 | 2.88E-05 | 2.35E-05 | 12  |
| GO:0051052 | regulation of DNA metabolic process                      | 81/2102  | 376/16992 | 3.21E-07 | 3.35E-05 | 2.72E-05 | 81  |
| GO:0008608 | attachment of spindle microtubules to kinetochore        | 15/2102  | 29/16992  | 3.27E-07 | 3.35E-05 | 2.72E-05 | 15  |
| GO:0070507 | regulation of microtubule cytoskeleton organization      | 38/2102  | 132/16992 | 3.43E-07 | 3.45E-05 | 2.81E-05 | 38  |
| GO:0034502 | protein localization to                                  | 25/2102  | 70/16992  | 4.24E-07 | 4.13E-05 | 3.36E-05 | 25  |

|            |                                                        |         |           |          |          |          |    |
|------------|--------------------------------------------------------|---------|-----------|----------|----------|----------|----|
|            | chromosome                                             |         |           |          |          |          |    |
| GO:0000732 | strand displacement                                    | 14/2102 | 26/16992  | 4.25E-07 | 4.13E-05 | 3.36E-05 | 14 |
| GO:0035637 | multicellular<br>organismal signaling                  | 49/2102 | 192/16992 | 4.47E-07 | 4.23E-05 | 3.44E-05 | 49 |
| GO:0048660 | regulation of smooth<br>muscle cell<br>proliferation   | 34/2102 | 113/16992 | 4.51E-07 | 4.23E-05 | 3.44E-05 | 34 |
| GO:0033002 | muscle cell<br>proliferation                           | 44/2102 | 166/16992 | 5.54E-07 | 5.12E-05 | 4.17E-05 | 44 |
| GO:0003015 | heart process                                          | 61/2102 | 262/16992 | 6.07E-07 | 5.46E-05 | 4.44E-05 | 61 |
| GO:0090257 | regulation of muscle<br>system process                 | 51/2102 | 205/16992 | 6.10E-07 | 5.46E-05 | 4.44E-05 | 51 |
| GO:0043270 | positive regulation of<br>ion transport                | 54/2102 | 222/16992 | 6.22E-07 | 5.48E-05 | 4.45E-05 | 54 |
| GO:0034508 | centromere complex<br>assembly                         | 21/2102 | 54/16992  | 6.95E-07 | 6.03E-05 | 4.90E-05 | 21 |
| GO:0031055 | chromatin remodeling<br>at centromere                  | 19/2102 | 46/16992  | 7.86E-07 | 6.59E-05 | 5.36E-05 | 19 |
| GO:0034080 | CENP-A containing<br>nucleosome assembly               | 18/2102 | 42/16992  | 7.95E-07 | 6.59E-05 | 5.36E-05 | 18 |
| GO:0061641 | CENP-A containing<br>chromatin organization            | 18/2102 | 42/16992  | 7.95E-07 | 6.59E-05 | 5.36E-05 | 18 |
| GO:0048659 | smooth muscle cell<br>proliferation                    | 34/2102 | 116/16992 | 8.86E-07 | 7.20E-05 | 5.85E-05 | 34 |
| GO:0060047 | heart contraction                                      | 60/2102 | 259/16992 | 8.94E-07 | 7.20E-05 | 5.85E-05 | 60 |
| GO:0006937 | regulation of muscle<br>contraction                    | 40/2102 | 148/16992 | 1.04E-06 | 8.27E-05 | 6.73E-05 | 40 |
| GO:0030199 | collagen fibril<br>organization                        | 17/2102 | 39/16992  | 1.20E-06 | 9.43E-05 | 7.67E-05 | 17 |
| GO:0090068 | positive regulation of<br>cell cycle process           | 58/2102 | 250/16992 | 1.28E-06 | 9.92E-05 | 8.07E-05 | 58 |
| GO:0072006 | nephron development                                    | 38/2102 | 139/16992 | 1.42E-06 | 0.000108 | 8.77E-05 | 38 |
| GO:0000281 | mitotic cytokinesis                                    | 16/2102 | 36/16992  | 1.81E-06 | 0.000134 | 0.000109 | 16 |
| GO:0031577 | spindle checkpoint                                     | 16/2102 | 36/16992  | 1.81E-06 | 0.000134 | 0.000109 | 16 |
| GO:0043486 | histone exchange                                       | 20/2102 | 53/16992  | 2.23E-06 | 0.000163 | 0.000132 | 20 |
| GO:0044243 | multicellular<br>organismal catabolic<br>process       | 25/2102 | 76/16992  | 2.45E-06 | 0.000177 | 0.000144 | 25 |
| GO:0007100 | mitotic centrosome<br>separation                       | 9/2102  | 13/16992  | 2.99E-06 | 0.000213 | 0.000173 | 9  |
| GO:0045787 | positive regulation of<br>cell cycle                   | 72/2102 | 341/16992 | 3.09E-06 | 0.000217 | 0.000177 | 72 |
| GO:0010959 | regulation of metal ion<br>transport                   | 69/2102 | 323/16992 | 3.21E-06 | 0.000224 | 0.000182 | 69 |
| GO:0060402 | calcium ion transport<br>into cytosol                  | 35/2102 | 128/16992 | 3.61E-06 | 0.000248 | 0.000202 | 35 |
| GO:0061640 | cytoskeleton-dependent<br>cytokinesis                  | 18/2102 | 46/16992  | 3.88E-06 | 0.000262 | 0.000213 | 18 |
| GO:0000731 | DNA synthesis<br>involved in DNA repair                | 24/2102 | 73/16992  | 3.91E-06 | 0.000262 | 0.000213 | 24 |
| GO:0010522 | regulation of calcium<br>ion transport into<br>cytosol | 27/2102 | 88/16992  | 4.44E-06 | 0.000293 | 0.000238 | 27 |
| GO:0051928 | positive regulation of<br>calcium ion transport        | 29/2102 | 98/16992  | 4.47E-06 | 0.000293 | 0.000238 | 29 |
| GO:0007093 | mitotic cell cycle<br>checkpoint                       | 39/2102 | 151/16992 | 4.73E-06 | 0.000307 | 0.000249 | 39 |

|            |                                                                               |         |           |          |          |          |    |
|------------|-------------------------------------------------------------------------------|---------|-----------|----------|----------|----------|----|
| GO:0000083 | regulation of transcription involved in G1/S transition of mitotic cell cycle | 13/2102 | 27/16992  | 5.69E-06 | 0.000364 | 0.000296 | 13 |
| GO:0006302 | double-strand break repair                                                    | 49/2102 | 209/16992 | 6.11E-06 | 0.000387 | 0.000315 | 49 |
| GO:0007271 | synaptic transmission, cholinergic                                            | 15/2102 | 35/16992  | 6.61E-06 | 0.000414 | 0.000337 | 15 |
| GO:0090279 | regulation of calcium ion import                                              | 29/2102 | 100/16992 | 6.94E-06 | 0.00043  | 0.00035  | 29 |
| GO:0051054 | positive regulation of DNA metabolic process                                  | 49/2102 | 210/16992 | 7.03E-06 | 0.000431 | 0.00035  | 49 |
| GO:0061337 | cardiac conduction                                                            | 36/2102 | 137/16992 | 7.11E-06 | 0.000431 | 0.000351 | 36 |
| GO:0070509 | calcium ion import                                                            | 40/2102 | 159/16992 | 7.19E-06 | 0.000431 | 0.000351 | 40 |
| GO:0051299 | centrosome separation                                                         | 9/2102  | 14/16992  | 7.44E-06 | 0.000442 | 0.000359 | 9  |
| GO:0090329 | regulation of DNA-dependent DNA replication                                   | 17/2102 | 44/16992  | 8.80E-06 | 0.000517 | 0.00042  | 17 |
| GO:0032886 | regulation of microtubule-based process                                       | 39/2102 | 155/16992 | 9.27E-06 | 0.000536 | 0.000436 | 39 |
| GO:0006334 | nucleosome assembly                                                           | 37/2102 | 144/16992 | 9.33E-06 | 0.000536 | 0.000436 | 37 |
| GO:0006336 | DNA replication-independent nucleosome assembly                               | 19/2102 | 53/16992  | 9.55E-06 | 0.000544 | 0.000442 | 19 |
| GO:0031497 | chromatin assembly                                                            | 40/2102 | 161/16992 | 9.93E-06 | 0.00056  | 0.000455 | 40 |
| GO:0000722 | telomere maintenance via recombination                                        | 15/2102 | 36/16992  | 1.00E-05 | 0.00056  | 0.000456 | 15 |
| GO:0007098 | centrosome cycle                                                              | 25/2102 | 82/16992  | 1.12E-05 | 0.000611 | 0.000497 | 25 |
| GO:0045132 | meiotic chromosome segregation                                                | 26/2102 | 87/16992  | 1.13E-05 | 0.000611 | 0.000497 | 26 |
| GO:0051225 | spindle assembly                                                              | 26/2102 | 87/16992  | 1.13E-05 | 0.000611 | 0.000497 | 26 |
| GO:1901990 | regulation of mitotic cell cycle phase transition                             | 66/2102 | 316/16992 | 1.14E-05 | 0.000611 | 0.000497 | 66 |
| GO:0051297 | centrosome organization                                                       | 31/2102 | 113/16992 | 1.19E-05 | 0.00063  | 0.000513 | 31 |
| GO:0032835 | glomerulus development                                                        | 21/2102 | 63/16992  | 1.22E-05 | 0.000642 | 0.000522 | 21 |
| GO:0034724 | DNA replication-independent nucleosome organization                           | 19/2102 | 54/16992  | 1.30E-05 | 0.00068  | 0.000553 | 19 |
| GO:0007080 | mitotic metaphase plate congression                                           | 16/2102 | 41/16992  | 1.39E-05 | 0.000717 | 0.000583 | 16 |
| GO:0051383 | kinetochore organization                                                      | 10/2102 | 18/16992  | 1.40E-05 | 0.000717 | 0.000583 | 10 |
| GO:0071173 | spindle assembly checkpoint                                                   | 13/2102 | 29/16992  | 1.51E-05 | 0.000769 | 0.000625 | 13 |
| GO:0033045 | regulation of sister chromatid segregation                                    | 21/2102 | 64/16992  | 1.60E-05 | 0.000807 | 0.000656 | 21 |
| GO:0006275 | regulation of DNA replication                                                 | 31/2102 | 115/16992 | 1.74E-05 | 0.000855 | 0.000695 | 31 |
| GO:0051924 | regulation of calcium ion transport                                           | 47/2102 | 205/16992 | 1.75E-05 | 0.000855 | 0.000695 | 47 |
| GO:0007091 | metaphase/anaphase transition of mitotic                                      | 17/2102 | 46/16992  | 1.76E-05 | 0.000855 | 0.000695 | 17 |



|            |                                                               |         |           |          |          |          |    |
|------------|---------------------------------------------------------------|---------|-----------|----------|----------|----------|----|
|            | cell cycle                                                    |         |           |          |          |          |    |
| GO:0010965 | regulation of mitotic sister chromatid separation             | 17/2102 | 46/16992  | 1.76E-05 | 0.000855 | 0.000695 | 17 |
| GO:0007517 | muscle organ development                                      | 71/2102 | 353/16992 | 2.06E-05 | 0.000992 | 0.000807 | 71 |
| GO:0061448 | connective tissue development                                 | 52/2102 | 236/16992 | 2.08E-05 | 0.000994 | 0.000809 | 52 |
| GO:1903779 | regulation of cardiac conduction                              | 22/2102 | 70/16992  | 2.19E-05 | 0.001038 | 0.000844 | 22 |
| GO:0030261 | chromosome condensation                                       | 14/2102 | 34/16992  | 2.33E-05 | 0.001095 | 0.000891 | 14 |
| GO:0031570 | DNA integrity checkpoint                                      | 39/2102 | 161/16992 | 2.38E-05 | 0.001109 | 0.000902 | 39 |
| GO:0043113 | receptor clustering                                           | 17/2102 | 47/16992  | 2.44E-05 | 0.001109 | 0.000902 | 17 |
| GO:0044784 | metaphase/anaphase transition of cell cycle                   | 17/2102 | 47/16992  | 2.44E-05 | 0.001109 | 0.000902 | 17 |
| GO:1905818 | regulation of chromosome separation                           | 17/2102 | 47/16992  | 2.44E-05 | 0.001109 | 0.000902 | 17 |
| GO:0007568 | aging                                                         | 59/2102 | 280/16992 | 2.48E-05 | 0.001117 | 0.000908 | 59 |
| GO:0000724 | double-strand break repair via homologous recombination       | 28/2102 | 101/16992 | 2.50E-05 | 0.001117 | 0.000909 | 28 |
| GO:0060401 | cytosolic calcium ion transport                               | 35/2102 | 139/16992 | 2.56E-05 | 0.001138 | 0.000925 | 35 |
| GO:0031099 | regeneration                                                  | 41/2102 | 173/16992 | 2.59E-05 | 0.001142 | 0.000929 | 41 |
| GO:0048568 | embryonic organ development                                   | 81/2102 | 420/16992 | 2.75E-05 | 0.001203 | 0.000979 | 81 |
| GO:0051279 | regulation of release of sequestered calcium ion into cytosol | 22/2102 | 71/16992  | 2.81E-05 | 0.001217 | 0.00099  | 22 |
| GO:0007127 | meiosis I                                                     | 29/2102 | 107/16992 | 2.87E-05 | 0.001226 | 0.000997 | 29 |
| GO:0051208 | sequestering of calcium ion                                   | 29/2102 | 107/16992 | 2.87E-05 | 0.001226 | 0.000997 | 29 |
| GO:0000725 | recombinational repair                                        | 28/2102 | 102/16992 | 3.04E-05 | 0.001289 | 0.001048 | 28 |
| GO:0022616 | DNA strand elongation                                         | 11/2102 | 23/16992  | 3.28E-05 | 0.001381 | 0.001123 | 11 |
| GO:0046605 | regulation of centrosome cycle                                | 17/2102 | 48/16992  | 3.35E-05 | 0.001386 | 0.001127 | 17 |
| GO:0051306 | mitotic sister chromatid separation                           | 17/2102 | 48/16992  | 3.35E-05 | 0.001386 | 0.001127 | 17 |
| GO:1904385 | cellular response to angiotensin                              | 9/2102  | 16/16992  | 3.37E-05 | 0.001386 | 0.001127 | 9  |
| GO:0098801 | regulation of renal system process                            | 14/2102 | 35/16992  | 3.45E-05 | 0.001408 | 0.001145 | 14 |
| GO:0031023 | microtubule organizing center organization                    | 31/2102 | 119/16992 | 3.60E-05 | 0.00146  | 0.001187 | 31 |
| GO:0051209 | release of sequestered calcium ion into cytosol               | 28/2102 | 103/16992 | 3.69E-05 | 0.001475 | 0.0012   | 28 |
| GO:0051283 | negative regulation of sequestering of calcium ion            | 28/2102 | 103/16992 | 3.69E-05 | 0.001475 | 0.0012   | 28 |
| GO:1902969 | mitotic DNA replication                                       | 7/2102  | 10/16992  | 3.75E-05 | 0.001487 | 0.001209 | 7  |
| GO:0090307 | mitotic spindle assembly                                      | 18/2102 | 53/16992  | 3.79E-05 | 0.001493 | 0.001214 | 18 |

|            |                                                                                                                                                  |         |           |          |          |          |    |
|------------|--------------------------------------------------------------------------------------------------------------------------------------------------|---------|-----------|----------|----------|----------|----|
| GO:0030071 | regulation of mitotic metaphase/anaphase transition                                                                                              | 16/2102 | 44/16992  | 3.90E-05 | 0.001528 | 0.001243 | 16 |
| GO:0051216 | cartilage development                                                                                                                            | 42/2102 | 182/16992 | 4.07E-05 | 0.001581 | 0.001286 | 42 |
| GO:0006941 | striated muscle contraction                                                                                                                      | 39/2102 | 165/16992 | 4.30E-05 | 0.00166  | 0.00135  | 39 |
| GO:0034728 | nucleosome organization                                                                                                                          | 40/2102 | 171/16992 | 4.44E-05 | 0.001699 | 0.001382 | 40 |
| GO:0051282 | regulation of sequestering of calcium ion                                                                                                        | 28/2102 | 104/16992 | 4.46E-05 | 0.001699 | 0.001382 | 28 |
| GO:0045930 | negative regulation of mitotic cell cycle                                                                                                        | 57/2102 | 274/16992 | 4.93E-05 | 0.001864 | 0.001516 | 57 |
| GO:1902099 | regulation of metaphase/anaphase transition of cell cycle                                                                                        | 16/2102 | 45/16992  | 5.37E-05 | 0.002017 | 0.00164  | 16 |
| GO:0051310 | metaphase plate congression                                                                                                                      | 17/2102 | 50/16992  | 6.09E-05 | 0.002273 | 0.001848 | 17 |
| GO:0000910 | cytokinesis                                                                                                                                      | 34/2102 | 139/16992 | 6.26E-05 | 0.002322 | 0.001888 | 34 |
| GO:0045931 | positive regulation of mitotic cell cycle                                                                                                        | 32/2102 | 128/16992 | 6.49E-05 | 0.002391 | 0.001944 | 32 |
| GO:0008217 | regulation of blood pressure                                                                                                                     | 39/2102 | 168/16992 | 6.56E-05 | 0.002402 | 0.001954 | 39 |
| GO:0006942 | regulation of striated muscle contraction                                                                                                        | 24/2102 | 85/16992  | 6.72E-05 | 0.002443 | 0.001987 | 24 |
| GO:0006333 | chromatin assembly or disassembly                                                                                                                | 42/2102 | 186/16992 | 6.93E-05 | 0.002504 | 0.002036 | 42 |
| GO:0048662 | negative regulation of smooth muscle cell proliferation                                                                                          | 14/2102 | 37/16992  | 7.13E-05 | 0.002561 | 0.002083 | 14 |
| GO:1901654 | response to ketone                                                                                                                               | 41/2102 | 181/16992 | 7.80E-05 | 0.002782 | 0.002263 | 41 |
| GO:0090280 | positive regulation of calcium ion import                                                                                                        | 17/2102 | 51/16992  | 8.09E-05 | 0.002866 | 0.002331 | 17 |
| GO:0007076 | mitotic chromosome condensation                                                                                                                  | 8/2102  | 14/16992  | 8.13E-05 | 0.002866 | 0.002331 | 8  |
| GO:0002824 | positive regulation of adaptive immune response based on somatic recombination of immune receptors built from immunoglobulin superfamily domains | 22/2102 | 76/16992  | 8.87E-05 | 0.003104 | 0.002524 | 22 |
| GO:0006939 | smooth muscle contraction                                                                                                                        | 26/2102 | 97/16992  | 8.92E-05 | 0.003104 | 0.002524 | 26 |
| GO:1901987 | regulation of cell cycle phase transition                                                                                                        | 66/2102 | 337/16992 | 9.20E-05 | 0.003161 | 0.002571 | 66 |
| GO:0051988 | regulation of attachment of spindle microtubules to kinetochore                                                                                  | 7/2102  | 11/16992  | 9.20E-05 | 0.003161 | 0.002571 | 7  |
| GO:0006338 | chromatin remodeling                                                                                                                             | 37/2102 | 159/16992 | 9.45E-05 | 0.003228 | 0.002625 | 37 |
| GO:0060993 | kidney morphogenesis                                                                                                                             | 25/2102 | 92/16992  | 9.51E-05 | 0.003228 | 0.002625 | 25 |
| GO:0032845 | negative regulation of homeostatic process                                                                                                       | 41/2102 | 183/16992 | 0.000101 | 0.00341  | 0.002773 | 41 |
| GO:0097553 | calcium ion transmembrane import into cytosol                                                                                                    | 28/2102 | 109/16992 | 0.00011  | 0.003654 | 0.002971 | 28 |

|            |                                                                 |         |           |          |          |          |    |
|------------|-----------------------------------------------------------------|---------|-----------|----------|----------|----------|----|
| GO:1902656 | calcium ion import into cytosol                                 | 28/2102 | 109/16992 | 0.00011  | 0.003654 | 0.002971 | 28 |
| GO:0048732 | gland development                                               | 78/2102 | 417/16992 | 0.000111 | 0.003659 | 0.002975 | 78 |
| GO:0006813 | potassium ion transport                                         | 48/2102 | 226/16992 | 0.000111 | 0.003659 | 0.002975 | 48 |
| GO:0048557 | embryonic digestive tract morphogenesis                         | 9/2102  | 18/16992  | 0.000113 | 0.003685 | 0.002997 | 9  |
| GO:1990776 | response to angiotensin                                         | 9/2102  | 18/16992  | 0.000113 | 0.003685 | 0.002997 | 9  |
| GO:0048566 | embryonic digestive tract development                           | 13/2102 | 34/16992  | 0.000114 | 0.003685 | 0.002997 | 13 |
| GO:0007204 | positive regulation of cytosolic calcium ion concentration      | 54/2102 | 264/16992 | 0.000122 | 0.003935 | 0.0032   | 54 |
| GO:0010035 | response to inorganic substance                                 | 88/2102 | 485/16992 | 0.000127 | 0.004058 | 0.0033   | 88 |
| GO:1904062 | regulation of cation transmembrane transport                    | 52/2102 | 252/16992 | 0.000128 | 0.004058 | 0.0033   | 52 |
| GO:0002825 | regulation of T-helper 1 type immune response                   | 10/2102 | 22/16992  | 0.000129 | 0.004058 | 0.0033   | 10 |
| GO:0036297 | interstrand cross-link repair                                   | 16/2102 | 48/16992  | 0.00013  | 0.004058 | 0.0033   | 16 |
| GO:0071804 | cellular potassium ion transport                                | 42/2102 | 191/16992 | 0.00013  | 0.004058 | 0.0033   | 42 |
| GO:0071805 | potassium ion transmembrane transport                           | 42/2102 | 191/16992 | 0.00013  | 0.004058 | 0.0033   | 42 |
| GO:0060706 | cell differentiation involved in embryonic placenta development | 11/2102 | 26/16992  | 0.000132 | 0.004076 | 0.003315 | 11 |
| GO:0002287 | alpha-beta T cell activation involved in immune response        | 17/2102 | 53/16992  | 0.000139 | 0.00423  | 0.00344  | 17 |
| GO:0002293 | alpha-beta T cell differentiation involved in immune response   | 17/2102 | 53/16992  | 0.000139 | 0.00423  | 0.00344  | 17 |
| GO:0033047 | regulation of mitotic sister chromatid segregation              | 17/2102 | 53/16992  | 0.000139 | 0.00423  | 0.00344  | 17 |
| GO:0032200 | telomere organization                                           | 37/2102 | 162/16992 | 0.000142 | 0.004315 | 0.003509 | 37 |
| GO:2000573 | positive regulation of DNA biosynthetic process                 | 19/2102 | 63/16992  | 0.000145 | 0.004371 | 0.003555 | 19 |
| GO:0042692 | muscle cell differentiation                                     | 69/2102 | 362/16992 | 0.000152 | 0.004543 | 0.003694 | 69 |
| GO:0032392 | DNA geometric change                                            | 23/2102 | 84/16992  | 0.000157 | 0.004695 | 0.003818 | 23 |
| GO:0021537 | telencephalon development                                       | 49/2102 | 236/16992 | 0.000169 | 0.005022 | 0.004084 | 49 |
| GO:0072073 | kidney epithelium development                                   | 33/2102 | 140/16992 | 0.00017  | 0.005026 | 0.004087 | 33 |
| GO:0050771 | negative regulation of axonogenesis                             | 16/2102 | 49/16992  | 0.000171 | 0.00503  | 0.004091 | 16 |
| GO:0032508 | DNA duplex unwinding                                            | 21/2102 | 74/16992  | 0.000173 | 0.005039 | 0.004098 | 21 |
| GO:0043044 | ATP-dependent chromatin remodeling                              | 21/2102 | 74/16992  | 0.000173 | 0.005039 | 0.004098 | 21 |
| GO:0007178 | transmembrane receptor protein serine/threonine kinase          | 61/2102 | 312/16992 | 0.000175 | 0.005052 | 0.004109 | 61 |

|            |                                                                |         |           |          |          |          |    |
|------------|----------------------------------------------------------------|---------|-----------|----------|----------|----------|----|
|            | signaling pathway                                              |         |           |          |          |          |    |
| GO:0060688 | regulation of morphogenesis of a branching structure           | 17/2102 | 54/16992  | 0.000179 | 0.005137 | 0.004178 | 17 |
| GO:0060537 | muscle tissue development                                      | 67/2102 | 351/16992 | 0.00018  | 0.005137 | 0.004178 | 67 |
| GO:0003014 | renal system process                                           | 28/2102 | 112/16992 | 0.000181 | 0.005137 | 0.004178 | 28 |
| GO:0045005 | DNA-dependent DNA replication maintenance of fidelity          | 12/2102 | 31/16992  | 0.000181 | 0.005137 | 0.004178 | 12 |
| GO:0002292 | T cell differentiation involved in immune response             | 18/2102 | 59/16992  | 0.000183 | 0.005157 | 0.004194 | 18 |
| GO:0051302 | regulation of cell division                                    | 32/2102 | 135/16992 | 0.00019  | 0.005331 | 0.004335 | 32 |
| GO:0003093 | regulation of glomerular filtration                            | 7/2102  | 12/16992  | 0.000197 | 0.005481 | 0.004457 | 7  |
| GO:0007094 | mitotic spindle assembly checkpoint                            | 11/2102 | 27/16992  | 0.000197 | 0.005481 | 0.004457 | 11 |
| GO:0042472 | inner ear morphogenesis                                        | 25/2102 | 96/16992  | 0.000199 | 0.005487 | 0.004462 | 25 |
| GO:0002821 | positive regulation of adaptive immune response                | 22/2102 | 80/16992  | 0.000203 | 0.00557  | 0.00453  | 22 |
| GO:0001889 | liver development                                              | 31/2102 | 130/16992 | 0.000212 | 0.005799 | 0.004716 | 31 |
| GO:0001823 | mesonephros development                                        | 26/2102 | 102/16992 | 0.000217 | 0.005882 | 0.004784 | 26 |
| GO:1904064 | positive regulation of cation transmembrane transport          | 26/2102 | 102/16992 | 0.000217 | 0.005882 | 0.004784 | 26 |
| GO:0090183 | regulation of kidney development                               | 17/2102 | 55/16992  | 0.00023  | 0.006207 | 0.005048 | 17 |
| GO:0003018 | vascular process in circulatory system                         | 35/2102 | 154/16992 | 0.000235 | 0.006302 | 0.005125 | 35 |
| GO:0051238 | sequestering of metal ion                                      | 30/2102 | 125/16992 | 0.000236 | 0.006302 | 0.005125 | 30 |
| GO:0000086 | G2/M transition of mitotic cell cycle                          | 48/2102 | 233/16992 | 0.000238 | 0.006322 | 0.005142 | 48 |
| GO:0030879 | mammary gland development                                      | 31/2102 | 131/16992 | 0.000245 | 0.006491 | 0.005278 | 31 |
| GO:0048608 | reproductive structure development                             | 77/2102 | 421/16992 | 0.000254 | 0.006679 | 0.005432 | 77 |
| GO:0000723 | telomere maintenance                                           | 34/2102 | 149/16992 | 0.000264 | 0.006934 | 0.005639 | 34 |
| GO:0032355 | response to estradiol                                          | 30/2102 | 126/16992 | 0.000274 | 0.007139 | 0.005806 | 30 |
| GO:0035850 | epithelial cell differentiation involved in kidney development | 15/2102 | 46/16992  | 0.000276 | 0.007176 | 0.005836 | 15 |
| GO:0007548 | sex differentiation                                            | 53/2102 | 266/16992 | 0.000279 | 0.007213 | 0.005866 | 53 |
| GO:0072507 | divalent inorganic cation homeostasis                          | 79/2102 | 436/16992 | 0.000287 | 0.007391 | 0.00601  | 79 |
| GO:0051784 | negative regulation of nuclear division                        | 16/2102 | 51/16992  | 0.000288 | 0.007391 | 0.00601  | 16 |
| GO:0014910 | regulation of smooth muscle cell migration                     | 17/2102 | 56/16992  | 0.000293 | 0.007435 | 0.006047 | 17 |
| GO:0061005 | cell differentiation involved in kidney development            | 17/2102 | 56/16992  | 0.000293 | 0.007435 | 0.006047 | 17 |
| GO:2000147 | positive regulation of                                         | 75/2102 | 410/16992 | 0.000302 | 0.007622 | 0.006198 | 75 |

|            |                                                                             |         |           |          |          |          |    |
|------------|-----------------------------------------------------------------------------|---------|-----------|----------|----------|----------|----|
|            | cell motility                                                               |         |           |          |          |          |    |
| GO:0044839 | cell cycle G2/M phase transition                                            | 49/2102 | 242/16992 | 0.000315 | 0.007918 | 0.006439 | 49 |
| GO:0031100 | animal organ regeneration                                                   | 21/2102 | 77/16992  | 0.000317 | 0.007918 | 0.006439 | 21 |
| GO:0061458 | reproductive system development                                             | 77/2102 | 424/16992 | 0.000317 | 0.007918 | 0.006439 | 77 |
| GO:0051101 | regulation of DNA binding                                                   | 27/2102 | 110/16992 | 0.000322 | 0.00796  | 0.006474 | 27 |
| GO:0072009 | nephron epithelium development                                              | 27/2102 | 110/16992 | 0.000322 | 0.00796  | 0.006474 | 27 |
| GO:0050880 | regulation of blood vessel size                                             | 31/2102 | 133/16992 | 0.000326 | 0.007976 | 0.006486 | 31 |
| GO:0061008 | hepaticobiliary system development                                          | 31/2102 | 133/16992 | 0.000326 | 0.007976 | 0.006486 | 31 |
| GO:0043583 | ear development                                                             | 43/2102 | 205/16992 | 0.000327 | 0.007976 | 0.006486 | 43 |
| GO:0042471 | ear morphogenesis                                                           | 28/2102 | 116/16992 | 0.000339 | 0.008233 | 0.006696 | 28 |
| GO:0072511 | divalent inorganic cation transport                                         | 78/2102 | 432/16992 | 0.00035  | 0.008462 | 0.006881 | 78 |
| GO:0006816 | calcium ion transport                                                       | 70/2102 | 379/16992 | 0.000355 | 0.008556 | 0.006958 | 70 |
| GO:0010524 | positive regulation of calcium ion transport into cytosol                   | 15/2102 | 47/16992  | 0.00036  | 0.008631 | 0.007019 | 15 |
| GO:0002294 | CD4-positive, alpha-beta T cell differentiation involved in immune response | 16/2102 | 52/16992  | 0.000369 | 0.008822 | 0.007174 | 16 |
| GO:0035150 | regulation of tube size                                                     | 31/2102 | 134/16992 | 0.000375 | 0.00892  | 0.007254 | 31 |
| GO:0051098 | regulation of binding                                                       | 61/2102 | 321/16992 | 0.000386 | 0.00912  | 0.007417 | 61 |
| GO:0051272 | positive regulation of cellular component movement                          | 76/2102 | 420/16992 | 0.000387 | 0.00912  | 0.007417 | 76 |
| GO:0034765 | regulation of ion transmembrane transport                                   | 74/2102 | 407/16992 | 0.000397 | 0.009318 | 0.007578 | 74 |
| GO:0030900 | forebrain development                                                       | 67/2102 | 361/16992 | 0.000409 | 0.009483 | 0.007712 | 67 |
| GO:0043370 | regulation of CD4-positive, alpha-beta T cell differentiation               | 13/2102 | 38/16992  | 0.000412 | 0.009483 | 0.007712 | 13 |
| GO:0003382 | epithelial cell morphogenesis                                               | 11/2102 | 29/16992  | 0.000414 | 0.009483 | 0.007712 | 11 |
| GO:0014808 | release of sequestered calcium ion into cytosol by sarcoplasmic reticulum   | 11/2102 | 29/16992  | 0.000414 | 0.009483 | 0.007712 | 11 |
| GO:0071174 | mitotic spindle checkpoint                                                  | 11/2102 | 29/16992  | 0.000414 | 0.009483 | 0.007712 | 11 |
| GO:2000516 | positive regulation of CD4-positive, alpha-beta T cell activation           | 11/2102 | 29/16992  | 0.000414 | 0.009483 | 0.007712 | 11 |
| GO:0070838 | divalent metal ion transport                                                | 77/2102 | 428/16992 | 0.000425 | 0.009704 | 0.007892 | 77 |
| GO:0016049 | cell growth                                                                 | 85/2102 | 482/16992 | 0.000427 | 0.009715 | 0.0079   | 85 |
| GO:2000278 | regulation of DNA biosynthetic process                                      | 24/2102 | 95/16992  | 0.00043  | 0.009738 | 0.007919 | 24 |

---

|            |                                          |         |           |          |          |          |    |
|------------|------------------------------------------|---------|-----------|----------|----------|----------|----|
| GO:0065004 | protein-DNA complex<br>assembly          | 48/2102 | 239/16992 | 0.000438 | 0.009834 | 0.007997 | 48 |
| GO:0030335 | positive regulation of<br>cell migration | 72/2102 | 395/16992 | 0.000438 | 0.009834 | 0.007997 | 72 |

---

**Table S3: Cellular component of GO analysis on DEGs.**

| <b>ID</b>  | <b>Description</b>                       | <b>Gene Ratio</b> | <b>Bg Ratio</b> | <b>p value</b> | <b>p.adjust</b> | <b>q value</b> | <b>Count</b> |
|------------|------------------------------------------|-------------------|-----------------|----------------|-----------------|----------------|--------------|
| GO:0000793 | condensed chromosome                     | 79/2239           | 209/18122       | 3.53E-21       | 1.23E-18        | 1.01E-18       | 79           |
| GO:0000775 | chromosome, centromeric region           | 74/2239           | 188/18122       | 3.90E-21       | 1.23E-18        | 1.01E-18       | 74           |
| GO:0098687 | chromosomal region                       | 107/2239          | 349/18122       | 5.68E-20       | 1.19E-17        | 9.80E-18       | 107          |
| GO:0000779 | condensed chromosome, centromeric region | 53/2239           | 115/18122       | 3.67E-19       | 5.79E-17        | 4.76E-17       | 53           |
| GO:0000776 | kinetochore                              | 53/2239           | 130/18122       | 2.64E-16       | 3.33E-14        | 2.74E-14       | 53           |
| GO:0000777 | condensed chromosome kinetochore         | 46/2239           | 103/18122       | 3.69E-16       | 3.88E-14        | 3.19E-14       | 46           |
| GO:0005819 | spindle                                  | 79/2239           | 301/18122       | 3.32E-11       | 2.99E-09        | 2.45E-09       | 79           |
| GO:0005578 | proteinaceous extracellular matrix       | 88/2239           | 359/18122       | 1.27E-10       | 9.62E-09        | 7.90E-09       | 88           |
| GO:0044454 | nuclear chromosome part                  | 111/2239          | 493/18122       | 1.37E-10       | 9.62E-09        | 7.90E-09       | 111          |
| GO:0005657 | replication fork                         | 27/2239           | 65/18122        | 3.28E-09       | 2.07E-07        | 1.70E-07       | 27           |
| GO:0005874 | microtubule                              | 89/2239           | 389/18122       | 4.11E-09       | 2.35E-07        | 1.93E-07       | 89           |
| GO:0000794 | condensed nuclear chromosome             | 31/2239           | 88/18122        | 2.56E-08       | 1.34E-06        | 1.10E-06       | 31           |
| GO:0031674 | I band                                   | 40/2239           | 132/18122       | 3.53E-08       | 1.71E-06        | 1.41E-06       | 40           |
| GO:0000940 | condensed chromosome outer kinetochore   | 10/2239           | 12/18122        | 4.24E-08       | 1.91E-06        | 1.57E-06       | 10           |
| GO:0000922 | spindle pole                             | 40/2239           | 135/18122       | 7.01E-08       | 2.94E-06        | 2.42E-06       | 40           |
| GO:0044449 | contractile fiber part                   | 53/2239           | 204/18122       | 8.00E-08       | 3.15E-06        | 2.59E-06       | 53           |
| GO:0042555 | MCM complex                              | 9/2239            | 11/18122        | 2.88E-07       | 1.07E-05        | 8.76E-06       | 9            |
| GO:0005581 | collagen trimer                          | 29/2239           | 88/18122        | 3.69E-07       | 1.26E-05        | 1.04E-05       | 29           |
| GO:0043292 | contractile fiber                        | 54/2239           | 219/18122       | 3.81E-07       | 1.26E-05        | 1.04E-05       | 54           |
| GO:0030018 | Z disc                                   | 35/2239           | 118/18122       | 4.39E-07       | 1.36E-05        | 1.12E-05       | 35           |
| GO:0030016 | myofibril                                | 52/2239           | 209/18122       | 4.61E-07       | 1.36E-05        | 1.12E-05       | 52           |
| GO:0030017 | sarcomere                                | 48/2239           | 187/18122       | 4.74E-07       | 1.36E-05        | 1.12E-05       | 48           |
| GO:0005871 | kinesin complex                          | 21/2239           | 54/18122        | 6.83E-07       | 1.87E-05        | 1.54E-05       | 21           |
| GO:0043596 | nuclear replication fork                 | 18/2239           | 43/18122        | 1.19E-06       | 3.13E-05        | 2.57E-05       | 18           |
| GO:0005875 | microtubule                              | 38/2239           | 144/18122       | 3.51E-06       | 8.53E-05        | 7.01E-05       | 38           |

|            |                                                  |         |           |          |          |          |    |
|------------|--------------------------------------------------|---------|-----------|----------|----------|----------|----|
|            | associated complex                               |         |           |          |          |          |    |
| GO:0072686 | mitotic spindle                                  | 23/2239 | 68/18122  | 3.52E-06 | 8.53E-05 | 7.01E-05 | 23 |
| GO:0098644 | complex of collagen trimers                      | 11/2239 | 20/18122  | 5.76E-06 | 0.000134 | 0.00011  | 11 |
| GO:0051233 | spindle midzone                                  | 13/2239 | 28/18122  | 9.30E-06 | 0.000209 | 0.000172 | 13 |
| GO:0030424 | axon                                             | 77/2239 | 385/18122 | 1.12E-05 | 0.00024  | 0.000197 | 77 |
| GO:0030425 | dendrite                                         | 89/2239 | 462/18122 | 1.14E-05 | 0.00024  | 0.000197 | 89 |
| GO:0044297 | cell body                                        | 92/2239 | 483/18122 | 1.31E-05 | 0.000265 | 0.000218 | 92 |
| GO:0098794 | postsynapse                                      | 80/2239 | 407/18122 | 1.48E-05 | 0.000292 | 0.00024  | 80 |
| GO:0005583 | fibrillar collagen trimer                        | 8/2239  | 12/18122  | 1.67E-05 | 0.00031  | 0.000255 | 8  |
| GO:0098643 | banded collagen fibril                           | 8/2239  | 12/18122  | 1.67E-05 | 0.00031  | 0.000255 | 8  |
| GO:0097060 | synaptic membrane                                | 61/2239 | 291/18122 | 2.09E-05 | 0.000376 | 0.000309 | 61 |
| GO:0000780 | condensed nuclear chromosome, centromeric region | 10/2239 | 19/18122  | 2.60E-05 | 0.000435 | 0.000358 | 10 |
| GO:0043034 | costamere                                        | 10/2239 | 19/18122  | 2.60E-05 | 0.000435 | 0.000358 | 10 |
| GO:1902495 | transmembrane transporter complex                | 65/2239 | 318/18122 | 2.62E-05 | 0.000435 | 0.000358 | 65 |
| GO:0005813 | centrosome                                       | 92/2239 | 492/18122 | 2.74E-05 | 0.000443 | 0.000364 | 92 |
| GO:0034702 | ion channel complex                              | 59/2239 | 282/18122 | 3.00E-05 | 0.000473 | 0.000389 | 59 |
| GO:0043204 | perikaryon                                       | 29/2239 | 110/18122 | 4.91E-05 | 0.000755 | 0.00062  | 29 |
| GO:1990351 | transporter complex                              | 65/2239 | 325/18122 | 5.27E-05 | 0.00079  | 0.000649 | 65 |
| GO:0043025 | neuronal cell body                               | 80/2239 | 422/18122 | 5.54E-05 | 0.000811 | 0.000667 | 80 |
| GO:0042383 | sarcolemma                                       | 30/2239 | 118/18122 | 7.63E-05 | 0.001093 | 0.000899 | 30 |
| GO:0045211 | postsynaptic membrane                            | 47/2239 | 220/18122 | 0.00011  | 0.001537 | 0.001264 | 47 |
| GO:0030894 | replisome                                        | 12/2239 | 30/18122  | 0.000124 | 0.001679 | 0.00138  | 12 |
| GO:0000785 | chromatin                                        | 86/2239 | 472/18122 | 0.000126 | 0.001679 | 0.00138  | 86 |
| GO:0005911 | cell-cell junction                               | 76/2239 | 406/18122 | 0.000128 | 0.001679 | 0.00138  | 76 |
| GO:0045121 | membrane raft                                    | 57/2239 | 285/18122 | 0.000148 | 0.001883 | 0.001548 | 57 |
| GO:0030496 | midbody                                          | 34/2239 | 145/18122 | 0.000149 | 0.001883 | 0.001548 | 34 |
| GO:0098857 | membrane microdomain                             | 57/2239 | 286/18122 | 0.000163 | 0.002008 | 0.001651 | 57 |
| GO:0044420 | extracellular matrix component                   | 29/2239 | 119/18122 | 0.000221 | 0.002677 | 0.002201 | 29 |
| GO:0005721 | pericentric                                      | 9/2239  | 20/18122  | 0.000308 | 0.003661 | 0.003009 | 9  |



|            |                                       |         |           |          |          |          |    |
|------------|---------------------------------------|---------|-----------|----------|----------|----------|----|
|            | heterochromatin                       |         |           |          |          |          |    |
| GO:0005876 | spindle<br>microtubule                | 16/2239 | 52/18122  | 0.000365 | 0.004254 | 0.003497 | 16 |
| GO:0043240 | Fanconi<br>anaemia nuclear<br>complex | 7/2239  | 13/18122  | 0.000379 | 0.004336 | 0.003565 | 7  |
| GO:0043601 | nuclear<br>replisome                  | 11/2239 | 29/18122  | 0.00041  | 0.004609 | 0.003789 | 11 |
| GO:0044291 | cell-cell contact<br>zone             | 18/2239 | 63/18122  | 0.000444 | 0.00491  | 0.004036 | 18 |
| GO:1990023 | mitotic spindle<br>midzone            | 6/2239  | 10/18122  | 0.000476 | 0.005169 | 0.00425  | 6  |
| GO:0034703 | cation channel<br>complex             | 42/2239 | 203/18122 | 0.000503 | 0.005376 | 0.004419 | 42 |

**Table S4: molecular function of GO analysis on DEGs.**

| <b>ID</b>  | <b>Description</b>                            | <b>Gene Ratio</b> | <b>Bg Ratio</b> | <b>p value</b> | <b>p.adjust</b> | <b>q value</b> | <b>Count</b> |
|------------|-----------------------------------------------|-------------------|-----------------|----------------|-----------------|----------------|--------------|
| GO:0043142 | single-stranded DNA-dependent ATPase activity | 10/2104           | 12/16982        | 4.35E-08       | 4.45E-05        | 4.14E-05       | 10           |
| GO:0015631 | tubulin binding                               | 67/2104           | 289/16982       | 2.17E-07       | 8.01E-05        | 7.45E-05       | 67           |
| GO:0003777 | microtubule motor activity                    | 27/2104           | 77/16982        | 2.35E-07       | 8.01E-05        | 7.45E-05       | 27           |
| GO:0003678 | DNA helicase activity                         | 20/2104           | 50/16982        | 7.68E-07       | 0.000196        | 0.000183       | 20           |
| GO:0005539 | glycosaminoglycan binding                     | 49/2104           | 201/16982       | 1.98E-06       | 0.000404        | 0.000376       | 49           |
| GO:0004386 | helicase activity                             | 39/2104           | 150/16982       | 4.13E-06       | 0.000704        | 0.000655       | 39           |
| GO:0008017 | microtubule binding                           | 50/2104           | 217/16982       | 8.63E-06       | 0.00126         | 0.001173       | 50           |
| GO:0016887 | ATPase activity                               | 82/2104           | 417/16982       | 1.25E-05       | 0.001595        | 0.001485       | 82           |
| GO:0008094 | DNA-dependent ATPase activity                 | 23/2104           | 76/16982        | 2.91E-05       | 0.00331         | 0.003082       | 23           |
| GO:0035173 | histone kinase activity                       | 9/2104            | 17/16982        | 6.45E-05       | 0.006592        | 0.006138       | 9            |
| GO:0048407 | platelet-derived growth factor binding        | 7/2104            | 11/16982        | 9.29E-05       | 0.008631        | 0.008036       | 7            |
| GO:0003682 | chromatin binding                             | 88/2104           | 482/16982       | 0.000107       | 0.00913         | 0.008501       | 88           |
| GO:0003774 | motor activity                                | 32/2104           | 132/16982       | 0.000125       | 0.009845        | 0.009166       | 32           |

**Table S5: information of gene and lncRNA in each module.**

| <b>Module</b> | <b>No. of Genes</b> | <b>No. of lncRNAs</b> |
|---------------|---------------------|-----------------------|
| turquoise     | 993                 | 267                   |
| blue          | 714                 | 166                   |
| yellow        | 125                 | 73                    |
| green         | 139                 | 31                    |
| black         | 43                  | 73                    |
| magenta       | 62                  | 4                     |
| red           | 108                 | 15                    |
| purple        | 28                  | 9                     |
| brown         | 80                  | 314                   |
| greenyellow   | 26                  | 10                    |
| pink          | 56                  | 17                    |

**Table S6: Pathway enrichment analysis on gene sets in each module**

| Module    | ID       | Description                                            | Gene Ratio | Bg Ratio | p value  | p.adjust | q value  | Count |
|-----------|----------|--------------------------------------------------------|------------|----------|----------|----------|----------|-------|
| turquoise | hsa04020 | Calcium signaling pathway                              | 28/359     | 182/7251 | 6.44E-08 | 1.71E-05 | 1.61E-05 | 28    |
| turquoise | hsa04080 | Neuroactive ligand-receptor interaction                | 33/359     | 278/7251 | 2.16E-06 | 0.000286 | 0.000269 | 33    |
| turquoise | hsa04261 | Adrenergic signaling in cardiomyocytes                 | 21/359     | 144/7251 | 7.12E-06 | 0.000629 | 0.000592 | 21    |
| turquoise | hsa04514 | Cell adhesion molecules (CAMs)                         | 19/359     | 145/7251 | 8.83E-05 | 0.004805 | 0.004523 | 19    |
| turquoise | hsa04530 | Tight junction                                         | 21/359     | 170/7251 | 9.07E-05 | 0.004805 | 0.004523 | 21    |
| turquoise | hsa04924 | Renin secretion                                        | 11/359     | 65/7251  | 0.000302 | 0.013326 | 0.012546 | 11    |
| turquoise | hsa04022 | cGMP-PKG signaling pathway                             | 19/359     | 163/7251 | 0.000415 | 0.014679 | 0.013819 | 19    |
| turquoise | hsa05414 | Dilated cardiomyopathy                                 | 13/359     | 90/7251  | 0.000443 | 0.014679 | 0.013819 | 13    |
| turquoise | hsa05410 | Hypertrophic cardiomyopathy (HCM)                      | 12/359     | 83/7251  | 0.000724 | 0.018102 | 0.017041 | 12    |
| turquoise | hsa05412 | Arrhythmogenic right ventricular cardiomyopathy (ARVC) | 11/359     | 72/7251  | 0.000747 | 0.018102 | 0.017041 | 11    |
| turquoise | hsa04024 | cAMP signaling pathway                                 | 21/359     | 198/7251 | 0.000751 | 0.018102 | 0.017041 | 21    |
| turquoise | hsa04270 | Vascular smooth muscle contraction                     | 15/359     | 121/7251 | 0.000875 | 0.01933  | 0.018198 | 15    |
| turquoise | hsa04923 | Regulation of lipolysis in adipocytes                  | 9/359      | 54/7251  | 0.001188 | 0.024213 | 0.022794 | 9     |
| turquoise | hsa04728 | Dopaminergic synapse                                   | 15/359     | 130/7251 | 0.001829 | 0.034612 | 0.032585 | 15    |
| turquoise | hsa05416 | Viral myocarditis                                      | 9/359      | 59/7251  | 0.002257 | 0.039878 | 0.037541 | 9     |
| turquoise | hsa04713 | Circadian entrainment                                  | 12/359     | 96/7251  | 0.002621 | 0.043414 | 0.040871 | 12    |
| blue      | hsa04110 | Cell cycle                                             | 37/260     | 124/7251 | 8.82E-25 | 1.95E-22 | 1.86E-22 | 37    |
| blue      | hsa03030 | DNA replication                                        | 16/260     | 36/7251  | 1.82E-14 | 2.01E-12 | 1.91E-12 | 16    |
| blue      | hsa03460 | Fanconi anemia pathway                                 | 17/260     | 55/7251  | 3.20E-12 | 2.36E-10 | 2.25E-10 | 17    |
| blue      | hsa03440 | Homologous recombination                               | 13/260     | 41/7251  | 8.64E-10 | 4.77E-08 | 4.55E-08 | 13    |
| blue      | hsa04115 | p53 signaling pathway                                  | 13/260     | 69/7251  | 7.71E-07 | 3.41E-05 | 3.25E-05 | 13    |
| blue      | hsa00240 | Pyrimidine metabolism                                  | 15/260     | 102/7251 | 2.96E-06 | 0.000109 | 0.000104 | 15    |
| blue      | hsa04114 | Oocyte meiosis                                         | 15/260     | 124/7251 | 3.33E-05 | 0.001052 | 0.001002 | 15    |
| blue      | hsa03430 | Mismatch repair                                        | 6/260      | 23/7251  | 0.000121 | 0.003344 | 0.003185 | 6     |
| blue      | hsa04914 | Progesterone-mediated oocyte maturation                | 12/260     | 96/7251  | 0.00015  | 0.003674 | 0.0035   | 12    |
| blue      | hsa03410 | Base excision repair                                   | 6/260      | 33/7251  | 0.000983 | 0.021715 | 0.020686 | 6     |
| blue      | hsa00230 | Purine metabolism                                      | 15/260     | 175/7251 | 0.001484 | 0.029814 | 0.028401 | 15    |
| green     | hsa05150 | Staphylococcus aureus infection                        | 9/79       | 56/7251  | 6.80E-09 | 9.93E-07 | 7.59E-07 | 9     |
| green     | hsa04658 | Th1 and Th2 cell differentiation                       | 10/79      | 92/7251  | 4.62E-08 | 3.37E-06 | 2.58E-06 | 10    |
| green     | hsa04380 | Osteoclast differentiation                             | 11/79      | 128/7251 | 1.10E-07 | 5.35E-06 | 4.09E-06 | 11    |
| green     | hsa04659 | Th17 cell differentiation                              | 10/79      | 107/7251 | 1.97E-07 | 7.21E-06 | 5.51E-06 | 10    |
| green     | hsa05323 | Rheumatoid arthritis                                   | 9/79       | 90/7251  | 4.71E-07 | 1.38E-05 | 1.05E-05 | 9     |
| green     | hsa05152 | Tuberculosis                                           | 11/79      | 179/7251 | 3.21E-06 | 7.80E-05 | 5.96E-05 | 11    |

|             |          |                                                      |       |          |          |          |          |    |
|-------------|----------|------------------------------------------------------|-------|----------|----------|----------|----------|----|
| green       | hsa04060 | Cytokine-cytokine receptor interaction               | 13/79 | 270/7251 | 5.79E-06 | 0.000106 | 8.14E-05 | 13 |
| green       | hsa05321 | Inflammatory bowel disease (IBD)                     | 7/79  | 65/7251  | 5.83E-06 | 0.000106 | 8.14E-05 | 7  |
| green       | hsa05322 | Systemic lupus erythematosus                         | 9/79  | 133/7251 | 1.24E-05 | 0.000202 | 0.000154 | 9  |
| green       | hsa05140 | Leishmaniasis                                        | 7/79  | 74/7251  | 1.39E-05 | 0.000204 | 0.000156 | 7  |
| green       | hsa04650 | Natural killer cell mediated cytotoxicity            | 8/79  | 133/7251 | 9.06E-05 | 0.001203 | 0.000919 | 8  |
| green       | hsa04514 | Cell adhesion molecules (CAMs)                       | 8/79  | 145/7251 | 0.000166 | 0.001988 | 0.001519 | 8  |
| green       | hsa04612 | Antigen processing and presentation                  | 6/79  | 77/7251  | 0.000177 | 0.001988 | 0.001519 | 6  |
| green       | hsa04145 | Phagosome                                            | 8/79  | 152/7251 | 0.00023  | 0.002394 | 0.001829 | 8  |
| green       | hsa05416 | Viral myocarditis                                    | 5/79  | 59/7251  | 0.000427 | 0.004157 | 0.003177 | 5  |
| green       | hsa05330 | Allograft rejection                                  | 4/79  | 38/7251  | 0.000727 | 0.006636 | 0.005071 | 4  |
| green       | hsa04062 | Chemokine signaling pathway                          | 8/79  | 185/7251 | 0.000857 | 0.00728  | 0.005564 | 8  |
| green       | hsa04620 | Toll-like receptor signaling pathway                 | 6/79  | 104/7251 | 0.000898 | 0.00728  | 0.005564 | 6  |
| green       | hsa05332 | Graft-versus-host disease                            | 4/79  | 41/7251  | 0.000973 | 0.007479 | 0.005716 | 4  |
| green       | hsa04940 | Type I diabetes mellitus                             | 4/79  | 43/7251  | 0.001167 | 0.008517 | 0.006509 | 4  |
| green       | hsa04142 | Lysosome                                             | 6/79  | 123/7251 | 0.002135 | 0.014842 | 0.011343 | 6  |
| green       | hsa04621 | NOD-like receptor signaling pathway                  | 7/79  | 168/7251 | 0.002258 | 0.014984 | 0.011451 | 7  |
| green       | hsa05320 | Autoimmune thyroid disease                           | 4/79  | 53/7251  | 0.00255  | 0.016187 | 0.01237  | 4  |
| green       | hsa04640 | Hematopoietic cell lineage                           | 5/79  | 97/7251  | 0.003987 | 0.024255 | 0.018536 | 5  |
| green       | hsa04630 | Jak-STAT signaling pathway                           | 6/79  | 156/7251 | 0.006876 | 0.040158 | 0.03069  | 6  |
| green       | hsa05340 | Primary immunodeficiency                             | 3/79  | 37/7251  | 0.007411 | 0.041615 | 0.031804 | 3  |
| magenta     | hsa04974 | Protein digestion and absorption                     | 8/32  | 90/7251  | 3.39E-09 | 2.34E-07 | 1.85E-07 | 8  |
| magenta     | hsa04512 | ECM-receptor interaction                             | 6/32  | 82/7251  | 1.25E-06 | 4.30E-05 | 3.41E-05 | 6  |
| magenta     | hsa04933 | AGE-RAGE signaling pathway in diabetic complications | 6/32  | 99/7251  | 3.78E-06 | 8.70E-05 | 6.90E-05 | 6  |
| magenta     | hsa04151 | PI3K-Akt signaling pathway                           | 9/32  | 342/7251 | 1.11E-05 | 0.000192 | 0.000152 | 9  |
| magenta     | hsa04510 | Focal adhesion                                       | 7/32  | 199/7251 | 1.98E-05 | 0.000274 | 0.000217 | 7  |
| magenta     | hsa04611 | Platelet activation                                  | 5/32  | 123/7251 | 0.000181 | 0.002077 | 0.001648 | 5  |
| magenta     | hsa05146 | Amoebiasis                                           | 4/32  | 96/7251  | 0.000781 | 0.007698 | 0.006106 | 4  |
| magenta     | hsa04610 | Complement and coagulation cascades                  | 3/32  | 79/7251  | 0.004919 | 0.042423 | 0.033654 | 3  |
| red         | hsa05322 | Systemic lupus erythematosus                         | 10/53 | 133/7251 | 3.06E-08 | 2.39E-06 | 2.26E-06 | 10 |
| red         | hsa05034 | Alcoholism                                           | 10/53 | 180/7251 | 5.35E-07 | 2.09E-05 | 1.97E-05 | 10 |
| red         | hsa05203 | Viral carcinogenesis                                 | 7/53  | 201/7251 | 0.000592 | 0.01539  | 0.014539 | 7  |
| greenyellow | hsa04971 | Gastric acid secretion                               | 4/16  | 75/7251  | 1.75E-05 | 0.000735 | 0.000718 | 4  |
| greenyellow | hsa04974 | Protein digestion and absorption                     | 3/16  | 90/7251  | 0.000921 | 0.019347 | 0.01891  | 3  |
| pink        | hsa04742 | Taste transduction                                   | 3/18  | 83/7251  | 0.001042 | 0.048997 | 0.044992 | 3  |

**Table S7: information of 15 hub genes.**

| <b>Gene Symbol</b> | <b>ENTREZ ID</b> | <b>Gene Name</b>                                            |
|--------------------|------------------|-------------------------------------------------------------|
| E2F3               | 1871             | E2F transcription factor 3                                  |
| DTL                | 51514            | denticleless E3 ubiquitin protein ligase homolog            |
| RBL1               | 5933             | RB transcriptional corepressor like 1                       |
| NUSAP1             | 51203            | nucleolar and spindle associated protein 1                  |
| ATAD2              | 29028            | ATPase family, AAA domain containing 2                      |
| KIF18B             | 146909           | kinesin family member 18B                                   |
| MCM10              | 55388            | minichromosome maintenance 10 replication initiation factor |
| RAD54L             | 8438             | RAD54-like ( <i>S. cerevisiae</i> )                         |
| NCAPH              | 23397            | non-SMC condensin I complex subunit H                       |
| PLK4               | 10733            | polo like kinase 4                                          |
| DKC1               | 1736             | dyskerin pseudouridine synthase 1                           |
| BUB1               | 699              | BUB1 mitotic checkpoint serine/threonine kinase             |
| CDCA5              | 113130           | cell division cycle associated 5                            |
| KPNA2              | 3838             | karyopherin subunit alpha 2                                 |
| TBC1D31            | 93594            | TBC1 domain family member 31                                |

**Table S8: GO and KEGG analysis for hub genes.**

| <b>ID</b>  | <b>Description</b>                      | <b>Gene Ratio</b> | <b>Bg Ratio</b> | <b>P value</b> | <b>Q value</b> |
|------------|-----------------------------------------|-------------------|-----------------|----------------|----------------|
| hsa04110   | Cell cycle                              | 3/8               | 124/7250        | 0.00027        | 0.0054         |
| GO:0000070 | mitotic sister chromatid segregation    | 5/14              | 134/16992       | 5.35e-08       | 6.25e-06       |
| GO:0007076 | mitotic chromosome condensation         | 3/14              | 14/16992        | 1.61e-07       | 9.42e-06       |
| GO:0000819 | sister chromatid segregation            | 5/14              | 218/16992       | 6.05e-07       | 2.36e-05       |
| GO:0098813 | nuclear chromosome segregation          | 5/14              | 287/16992       | 2.35e-06       | 6.13e-05       |
| GO:0030261 | chromosome condensation                 | 3/14              | 34/16992        | 2.624e-06      | 6.13e-05       |
| GO:0007059 | chromosome segregation                  | 5/14              | 330/16992       | 4.65e-06       | 9.05e-05       |
| GO:0007067 | mitotic nuclear division                | 5/14              | 453/16992       | 2.16e-05       | 0.00036        |
| GO:0071103 | DNA conformation change                 | 4/14              | 283/16992       | 6.61e-05       | 0.00091        |
| GO:0033044 | regulation of chromosome organization   | 4/14              | 288/16992       | 7.07e-05       | 0.00091        |
| GO:0007063 | regulation of sister chromatid cohesion | 2/14              | 20/16992        | 0.00012        | 0.0014         |
| GO:0007088 | regulation of mitotic nuclear division  | 3/14              | 151/16992       | 0.00023        | 0.0025         |
| GO:0051783 | regulation of nuclear division          | 3/14              | 173/16992       | 0.00035        | 0.0034         |
| GO:0007126 | meiotic nuclear division                | 3/14              | 184/16992       | 0.00042        | 0.0037         |
| GO:1903046 | meiotic cell cycle process              | 3/14              | 195/16992       | 0.00049        | 0.0041         |
| GO:0006323 | DNA packaging                           | 3/14              | 199/16992       | 0.00052        | 0.0041         |

**Table S9: Clinicopathological characteristics of gastric cancer patients**

|                                   | No. of Cases | %    |
|-----------------------------------|--------------|------|
| <b>Total no.</b>                  | 90           | 100  |
| <b>Age</b>                        |              |      |
| <67                               | 40           | 44.4 |
| ≥67                               | 50           | 55.6 |
| <b>Gender</b>                     |              |      |
| female                            | 22           | 46.7 |
| male                              | 68           | 53.3 |
| <b>Pathological types</b>         |              |      |
| adenocarcinoma                    | 75           | 83.3 |
| mucinous adenocarcinoma           | 5            | 5.6  |
| signet ring cell cancer           | 10           | 11.1 |
| <b>Pathological grade</b>         |              |      |
| <III                              | 48           | 53.3 |
| =III                              | 42           | 46.7 |
| <b>Diameter (cm)</b>              |              |      |
| <5.5                              | 42           | 46.7 |
| ≥5.5                              | 48           | 53.3 |
| <b>Location</b>                   |              |      |
| Upper third                       | 17           | 18.9 |
| Middle third                      | 21           | 23.3 |
| Lower third                       | 52           | 57.8 |
| <b>Tumor type</b>                 |              |      |
| Borrmann type I / II / VI         | 26           | 28.9 |
| Borrmann type III                 | 60           | 66.7 |
| Early gastric cancer              | 4            | 4.4  |
| <b>Serous membrane invasion</b>   |              |      |
| No                                | 30           | 33.3 |
| Yes                               | 60           | 66.7 |
| <b>Vascular or nerve invasion</b> |              |      |
| No                                | 66           | 55.4 |
| Yes                               | 24           | 44.6 |
| <b>Lymph node metastasis</b>      |              |      |
| No                                | 25           | 27.8 |
| Yes                               | 65           | 72.2 |
| <b>AJCC stage</b>                 |              |      |
| I/II                              | 42           | 46.7 |
| III/IV                            | 48           | 53.3 |
| <b>Overall survival</b>           |              |      |
| survived                          | 30           | 33.3 |
| dead                              | 60           | 66.7 |
